# Supplementary material
Source: Elsevier journal article supplement (https://www.sciencedirect.com/science/article/pii/S0213485321002851)
Supplement: mmc1 [file S0213485321002851:mmc1.pdf]

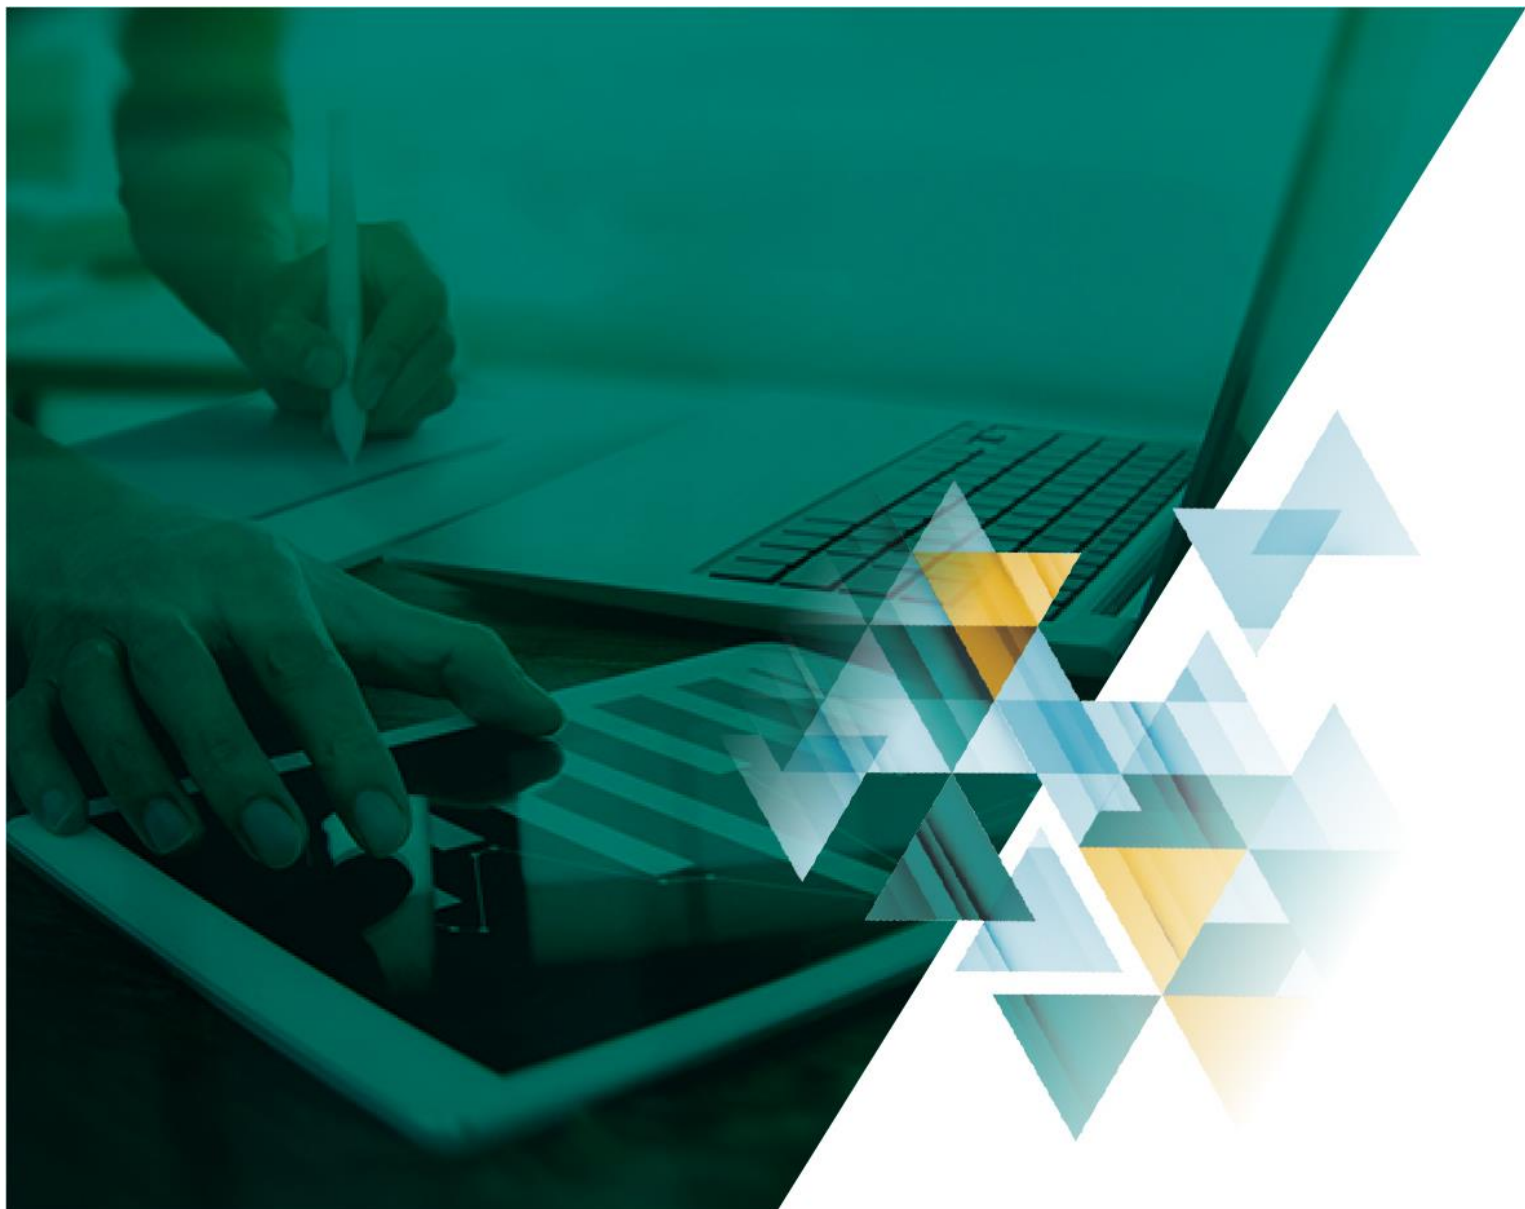

# MY-LIFE ANAMNESIS GUIDE

Quantitative research on a Migraine Anamnesis Guide (v2)

Diciembre de 2019

Adelphi

## Antecedentes

---

La migraña es una enfermedad que sólo puede diagnosticarse a través de la anamnesis. Existen diferentes herramientas para identificar o diagnosticar diferentes tipos de cefaleas, algunas de ellas se utilizan para cribar y clasificar la migraña, siendo la más utilizada la ID-Migraine. Sin embargo, la revisión de la literatura apoya la necesidad de una Guía para la Anamnesis validada para ser utilizada por los clínicos no expertos para identificar la cefalea crónica en atención primaria.

Con el objetivo de desarrollar una guía para apoyar a los expertos no especializados en migraña en la identificación de pacientes con migraña crónica o discapacitante, se ha creado el proyecto My-LIFE Anamnesis Guide con un Comité Científico que incluye a 7 expertos europeos en migraña.

Una vez definida la 1ª versión de la Guía de Anamnesis de Migraña por el Comité Científico, se testó su utilidad y precisión a través de 6 consultas simuladas realizadas en Barcelona y Londres en las que participaron 4 neurólogos y 2 médicos de cabecera con experiencia en el diagnóstico de migraña crónica, y 6 pacientes ya diagnosticados de migraña crónica.

Las principales conclusiones de estas consultas simuladas fueron:

- Parece que dicho documento inhibió la dinámica con el paciente
- Contenía información relevante, proporcionando un contexto útil y destacando las áreas de riesgo a las que había que prestar atención.

## Objetivo de la investigación cuantitativa

Recoger la opinión de **los médicos de atención primaria** sobre el contenido de una Guía de Anamnesis para la Migraña y su utilidad en la práctica clínica habitual.

## Cuestionario en línea

---

El objetivo de este cuestionario es recoger su opinión sobre la necesidad de una Guía para la Anamnesis de la Migraña que le apoye en la identificación de pacientes con migraña crónica e discapacitante, su contenido y su utilidad para la práctica clínica habitual.

El cuestionario consta de 3 secciones:

1. Antecedentes
2. Práctica clínica habitual en la identificación y el tratamiento de la migraña crónica e discapacitante
3. Definición de una guía para la anamnesis de la migraña

No hay una respuesta correcta ni incorrecta, lo que nos gustaría saber es su práctica clínica actual y su opinión sobre los temas que deben ser abordados en una Guía de Anamnesis de Migraña.

Por favor, responda a todas las preguntas con la mayor precisión y sinceridad que pueda.

Muchas gracias por su colaboración.

*Equipo del proyecto My-LIFE Anamnesis guide.*

|                                                        |
|--------------------------------------------------------|
| Por favor, haga clic aquí para iniciar el cuestionario |
|--------------------------------------------------------|

## Antecedentes

1. Especialidad médica:
  - a. Médico generalista
  - b. Neurólogo
  - c. Medicina interna
  - d. Psiquiatra
  - e. Otros: especifique:

(\* sólo pueden participar en esta encuesta los "médicos generalistas", la participación de otras especialidades médicas será anulada)

2. ¿Cuántos años hace que ejerce como médico generalista?

\_\_\_\_\_ años

(\* si < 2 años la participación del panelista será cancelada)

3. ¿Cuántos pacientes atiende en una semana?

\_\_\_\_\_pacientes

4. Entre estos pacientes, ¿cuántos de ellos padecen cefalea?

\_\_\_\_\_pacientes

(\* si < 5 la participación del panelista será cancelada)

5. Por favor, clasifique a sus pacientes que sufren cefalea según el tipo de cefalea que se indica a continuación:

|                                 |   |
|---------------------------------|---|
| Migraña                         | % |
| Cefalea de tipo tensional       | % |
| Cefalea en racimo               | % |
| Cefalea por abuso de medicación | % |
| Otros                           | % |

(\*el total puede sumar más del 100%)

6. ¿Suele proceder a la anamnesis de sus pacientes con cefalea?

- ☐ Sí
- ☐ No, cuando sospecho de una cefalea, remito al paciente a un especialista.

(\* si "No" la participación del panelista será cancelada)

7. Teniendo en cuenta las siguientes definiciones de *Steiner TJ et al. J Headache Pain. 2019 May 21;20(1):57*:

Migraña episódica: episodios recurrentes similares a un ataque, con una duración de 4h a 3 días, con una frecuencia a menudo de 1-2/mes pero variable de 1/año a 2/semana o más; ausencia de síntomas entre los ataques.

Migraña crónica: pérdida de la episodicidad: dolor de cabeza 15 días o más al mes, presentando rasgos migrañosos en  $\geq 8$  días/mes.

7a. ¿Cuántos de sus pacientes sufren de migraña episódica?

\_\_\_\_\_pacientes

7b. ¿Cuántos de sus pacientes sufren de migraña crónica?

\_\_\_\_\_pacientes

(\* si "7a" + "7b" son iguales a "0" la participación del panelista será cancelada)

8. ¿Quién hizo el diagnóstico de migraña episódica de esos pacientes?

- ☐ Lo hice yo mismo, para la mayoría de ellos.
- ☐ En la mayoría de los casos, lo hizo un especialista.

9. ¿Quién hizo el diagnóstico de migraña crónica de esos pacientes?

- ☐ Lo hice yo mismo, para la mayoría de ellos.
- ☐ En la mayoría de los casos, lo hizo un especialista.

## Práctica clínica habitual para la identificación y el tratamiento de la migraña discapacitante o crónica

10. Durante la anamnesis de un paciente con cefalea, ¿suele descartar la cefalea de tipo tensional?

- ☐ Siempre  
☐ A veces  
☐ Nunca

(\* sólo es posible una respuesta)

11. Durante la anamnesis de un paciente con cefalea, ¿suele descartar el abuso de medicación?

- ☐ Siempre  
☐ A veces  
☐ Nunca

(\* sólo es posible una respuesta)

12. Ante un paciente con migraña discapacitante o crónica, ¿cuándo utiliza las siguientes herramientas?

|                                                            | Primera visita           | Visita de seguimiento    |
|------------------------------------------------------------|--------------------------|--------------------------|
| Entrevista clínica                                         | <input type="checkbox"/> | <input type="checkbox"/> |
| Una guía de anamnesis para diagnosticar la migraña crónica | <input type="checkbox"/> | <input type="checkbox"/> |
| Un diario del paciente                                     | <input type="checkbox"/> | <input type="checkbox"/> |
| Técnicas de imagen (cuando es posible)                     | <input type="checkbox"/> | <input type="checkbox"/> |
| Una escala validada para evaluar el impacto de la migraña  | <input type="checkbox"/> | <input type="checkbox"/> |
| Una herramienta validada de cribado de la migraña          | <input type="checkbox"/> | <input type="checkbox"/> |
| Otros. Por favor, especifique                              | _____                    | _____                    |
| Ninguno de los mencionados anteriormente                   | <input type="checkbox"/> | <input type="checkbox"/> |

(\*son posibles más de 1 respuesta por fila y columna, si "ninguna de las anteriores" no se permite ninguna otra respuesta en la misma columna)

(13. Si se menciona la P12 "Guía de anamnesis":)

13a. ¿Qué tipo de guía para la anamnesis utiliza actualmente?

- ☐ Una guía/documento que he desarrollado yo mismo.
- ☐ Una guía de anamnesis elaborada por el centro donde trabajo.
- ☐ Una guía de anamnesis validada y publicada

(\* sólo es posible una respuesta)

13b. ¿Cuáles de los siguientes aspectos están incluidos en la guía para la anamnesis que utiliza actualmente? (Marque todos los que correspondan)

- ☐ Edad del paciente
- ☐ Antecedentes del paciente/historia clínica
- ☐ Antecedentes familiares
- ☐ Patrón temporal de los ataques
- ☐ Frecuencia de los ataques
- ☐ Estilo de vida
- ☐ Características del dolor de los ataques (intensidad, localización, duración, ...)
- ☐ Síntomas asociados a los ataques (fotofobia, fonofobia, náuseas, ...)
- ☐ Factores desencadenantes/agravantes
- ☐ Actividad del paciente durante el ataque
- ☐ Medicación utilizada, frecuencia, eficacia
- ☐ Percepción del paciente sobre la eficacia de la medicación utilizada
- ☐ Impacto de la migraña en su vida diaria (dolor que restringe la actividad)
- ☐ Otros: Especifique: \_\_\_\_\_

(\* es posible más de una respuesta)

13c. ¿Incluye la guía para la anamnesis que está utilizando actualmente advertencias o "*red flags*"?

- ☐ Sí
- ☐ No

(\* sólo es posible una respuesta)

(14. Si la P12 "Guía de anamnesis" NO se menciona)

14. ¿Qué temas suele abordar durante la anamnesis de los pacientes que sufren cefaleas?  
(Marque todos los que correspondan)

- ☐ Edad del paciente
- ☐ Antecedentes del paciente/historia clínica
- ☐ Antecedentes familiares
- ☐ Patrón temporal de los ataques (¿Cuándo empezaron los ataques? )
- ☐ Frecuencia de los ataques (¿Con qué frecuencia sufre el paciente los ataques?)
- ☐ Estilo de vida
- ☐ Características del dolor de los ataques (intensidad, localización, duración, ...)
- ☐ Síntomas asociados a los ataques (fotofobia, fonofobia, náuseas, ...)
- ☐ Factores desencadenantes/agravantes
- ☐ Actividad del paciente durante el ataque
- ☐ Medicación utilizada, frecuencia, eficacia
- ☐ Percepción del paciente sobre la eficacia de la medicación utilizada
- ☐ Impacto de la migraña en su vida diaria (dolor que restringe la actividad)
- ☐ Otros. Especifique: \_

(\* es posible más de una respuesta)

(15. Si se menciona Q12 "Diario del paciente":)

15a. ¿Qué tipo de diario de paciente recomienda a sus pacientes?

- ☐ Pido al paciente que anote algunos elementos en un cuaderno
- ☐ Utilizo un diario de paciente estándar que tenemos donde trabajo
- ☐ Utilizo un diario de paciente validado y/o publicado

(\* sólo es posible una respuesta)

15b. ¿Cuáles son los principales elementos registrados en el diario de paciente que utiliza actualmente? (Marque todo lo que corresponda)

- ☐ Días con dolor de cabeza
- ☐ Cuánto dura el dolor de cabeza
- ☐ Características del dolor de cabeza (localización, tipo de dolor, ...)
- ☐ Intensidad del dolor de cabeza
- ☐ Medicación tomada
- ☐ Impacto en la vida cotidiana
- ☐ Si el ataque empeora al hacer ejercicio
- ☐ Otros. Especifique: \_

(\* es posible más de una respuesta)



(16. Si se menciona Q12 "imagen":)

16. ¿Cuándo solicita pruebas mediante técnicas de imagen?

- ☐ Siempre
- ☐ A veces, para descartar cefaleas secundarias
- ☐ A veces, para tranquilizar al paciente
- ☐ Nunca

(\* si es "siempre" o "nunca" no se pueden marcar otras respuestas. Si es "a veces", ambas respuestas son posibles. )

(17. Si se menciona en la P12 "escala validada o herramienta de cribado de la migraña":)

17. Por favor, indique cuál de las siguientes escalas utiliza y cuándo:

|                                                                            | Primera visita           | Visita de seguimiento    |
|----------------------------------------------------------------------------|--------------------------|--------------------------|
| <b>ID-Migrane</b><br>Identificar la migraña                                | <input type="checkbox"/> | <input type="checkbox"/> |
| <b>ID-Chronic migraine</b><br>Identificar la migraña crónica               | <input type="checkbox"/> | <input type="checkbox"/> |
| <b>HALT-90 o HALT-30</b><br>Pérdida de tiempo atribuido al dolor de cabeza | <input type="checkbox"/> | <input type="checkbox"/> |
| <b>HIT-6</b><br>Impacto de la cefalea                                      | <input type="checkbox"/> | <input type="checkbox"/> |
| <b>HURT</b><br>Ausencia de respuesta al tratamiento para la cefalea        | <input type="checkbox"/> | <input type="checkbox"/> |
| <b>MAT</b><br>Herramienta de evaluación de la migraña                      | <input type="checkbox"/> | <input type="checkbox"/> |
| <b>MIDAS</b><br>Evaluación de la discapacidad por migraña                  | <input type="checkbox"/> | <input type="checkbox"/> |
| <b>Otros: Por favor, especifique</b>                                       | _____                    | _____                    |
| <b>Ninguno</b>                                                             | <input type="checkbox"/> | <input type="checkbox"/> |

(\*son posibles más de 1 respuesta por fila y columna, si es "ninguna" no se permite ninguna otra respuesta)

18. Una vez que el paciente ha sido diagnosticado de "migraña discapacitante o crónica", ¿cuál de las siguientes frases se ajusta mejor a su práctica diaria?

- ☐ Siempre trato su condición.
- ☐ Suelo tratar su condición.
- ☐ Normalmente no trato y derivo al paciente a un especialista.
- ☐ Siempre derivo al paciente a un especialista.

(\* sólo es posible una respuesta)

(19. Si Q18 "Trato su condición (siempre o usualmente)":)

19. ¿Qué tipo de tratamientos prescribe a sus pacientes que sufren de migraña discapacitante o crónica?

- ☐ Cuando es necesario, trato su estado con medicación aguda como analgésicos, antieméticos o fármacos específicos contra la migraña.
  - \_\_\_\_% de mis pacientes que sufren de migraña discapacitante o crónica a los que se les ha recetado algún fármaco analgésico o antiemético.
  - \_\_\_\_% de mis pacientes que padecen de migraña discapacitante o crónica reciben un tratamiento agudo específico contra la migraña.
- ☐ Cuando es necesario, trato su enfermedad con tratamientos profilácticos contra la migraña.
  - \_\_\_\_% de mis pacientes que padecen migraña discapacitante o crónica que están bajo tratamiento profiláctico.

(\*ambas respuestas son posibles)

(20. Si la pregunta 18 es "derivo a un especialista (normalmente o siempre)":)

20a. ¿Por qué remite a sus pacientes con migraña discapacitante o crónica a un especialista? (Marque todo lo que corresponda)

- ☐ Para confirmar el diagnóstico
- ☐ Para descartar cualquier cefalea secundaria
- ☐ Darles acceso a tratamientos profilácticos
- ☐ Otros. Por favor, especifique: \_\_\_\_\_

(\*todas las respuestas son posibles)

20b. Aunque remita a sus pacientes con migraña discapacitante o crónica a un especialista. ¿Se encarga usted de su seguimiento?

- ☐ Sí, me encargo del seguimiento de todos mis pacientes diagnosticados de migraña discapacitante o crónica
- ☐ Sí, me encargo del seguimiento de algunos de mis pacientes diagnosticados de migraña discapacitante o crónica
- ☐ No, el seguimiento lo hace el especialista

(\* sólo es posible una respuesta)

(21. Si P19: "Trato su condición con medicación aguda")

21a. ¿Cómo evalúa la eficacia del tratamiento agudo prescrito? (Marque todo lo que corresponda)

- ☐ Pregunto al paciente por su percepción del tratamiento prescrito
- ☐ Pido al paciente que rellene un diario para evaluar la frecuencia de los ataques de migraña
- ☐ Uso una escala validada para evaluar el impacto de la migraña en la vida diaria del paciente

(\*todas las respuestas son posibles)

21b. ¿Con qué frecuencia, por término medio, evalúa la eficacia del tratamiento agudo prescrito?

- ☐ Semanalmente
- ☐ Mensualmente
- ☐ Trimestralmente
- ☐ Semestralmente
- ☐ Anualmente
- ☐ Cuando el paciente vuelve y se queja de nuevo de su cefalea

(\* sólo es posible una respuesta)

(22. Si P19: "Trato su condición con tratamientos profilácticos para la migraña")

22a. ¿Cómo evalúa la eficacia del tratamiento profiláctico prescrito? (Marque todo lo que corresponda)

- ☐ Pregunto al paciente por su percepción del tratamiento prescrito
- ☐ Pido al paciente que rellene un diario para evaluar la frecuencia de los ataques de migraña
- ☐ Uso una escala validada para evaluar el impacto de la migraña en la vida diaria del paciente

(\*todas las respuestas son posibles)

22b. ¿Con qué frecuencia evalúa, por término medio, la eficacia del tratamiento profiláctico prescrito?

- ☐ Semanalmente
- ☐ Mensualmente
- ☐ Trimestralmente
- ☐ Semestralmente
- ☐ Anualmente
- ☐ Cuando el paciente vuelve y se queja de nuevo de su cefalea

(\* sólo es posible una respuesta)

(23. Si P20b: "Sí, me encargo del seguimiento de todos/algunos de mis pacientes")

23a. ¿Cómo evalúa la eficacia del tratamiento prescrito por el especialista? (Marque todo lo que corresponda)

- ☐ Pregunto al paciente por su percepción del tratamiento prescrito
- ☐ Pido al paciente que rellene un diario para evaluar la frecuencia de los ataques de migraña
- ☐ Uso una escala validada para evaluar el impacto de la migraña en la vida diaria del paciente

(\*todas las respuestas son posibles)

23b. ¿Con qué frecuencia, por término medio, evalúa la eficacia del tratamiento prescrito por el especialista?

- ☐ Semanalmente
- ☐ Mensualmente
- ☐ Trimestralmente
- ☐ Semestralmente
- ☐ Anualmente
- ☐ Cuando el paciente vuelve y se queja de nuevo de su cefalea

(\* sólo es posible una respuesta)

(Si P19a: "Trato su condición con medicación aguda" o si P19b: "Trato su condición con tratamientos profilácticos para la migraña" o si P20b: "Sí, me encargo del seguimiento de todos/algunos de mis pacientes")

24. ¿Cuándo considera que su paciente con migraña discapacitante y/o crónica debe ser derivado a un especialista en cefaleas? (Marque todo lo que corresponda)

- ☐ Incertidumbre diagnóstica
- ☐ Cuando la migraña es muy discapacitante
- ☐ Cuando sospecho de migraña con aura
- ☐ Cuando sospecho de migraña crónica
- ☐ Cuando el paciente no responde a la medicación aguda prescrita
- ☐ Cuando el paciente no responde al tratamiento profiláctico prescrito
- ☐ Cuando la calidad de vida se ve afectada negativamente por la migraña
- ☐ Cuando la frecuencia de los ataques de migraña aumenta
- ☐ Cuando la intensidad de los ataques de migraña aumenta
- ☐ Otros. Especifique: \_

(\*todas las respuestas son posibles)

25. ¿Considera que durante su formación como médico generalista ha recibido una formación adecuada sobre el manejo de los pacientes con migraña discapacitante y crónica?

- ☐ Sí, he recibido suficiente formación
- ☐ Sí, he recibido suficiente formación, pero sería interesante una actualización.
- ☐ No, creo que hay algunas carencias en este sentido.

(\* sólo es posible una respuesta)

## Definición de una guía para la anamnesis de la migraña

Con el fin de recabar su opinión sobre el contenido de una guía para la anamnesis de la migraña y su utilidad para su práctica clínica habitual, nos gustaría que respondiera a las siguientes preguntas considerando que el paciente acude a su consulta por 1ª vez quejándose de múltiples ataques de cefalea, y que usted sospecha que padece una migraña discapacitante o crónica.

26. ¿Considera que un documento que le guíe durante la anamnesis de un paciente con cefalea y le apoye cuando sea necesario derivarlo, sería...

- ☐ Obligatorio
- ☐ Útil
- ☐ No es necesario

(\* sólo es posible una respuesta)

27. Cuáles son los siguientes temas/preguntas considera que deben incluirse en una guía para la anamnesis de la migraña:

|                                                                                                                 | Obligatorio              | Útil                     | No es necesario          |
|-----------------------------------------------------------------------------------------------------------------|--------------------------|--------------------------|--------------------------|
| Edad del paciente                                                                                               | <input type="checkbox"/> | <input type="checkbox"/> | <input type="checkbox"/> |
| Antecedentes del paciente                                                                                       | <input type="checkbox"/> | <input type="checkbox"/> | <input type="checkbox"/> |
| Antecedentes familiares                                                                                         | <input type="checkbox"/> | <input type="checkbox"/> | <input type="checkbox"/> |
| Perfil temporal                                                                                                 | <input type="checkbox"/> | <input type="checkbox"/> | <input type="checkbox"/> |
| Frecuencia de los ataques                                                                                       | <input type="checkbox"/> | <input type="checkbox"/> | <input type="checkbox"/> |
| Estilo de vida                                                                                                  | <input type="checkbox"/> | <input type="checkbox"/> | <input type="checkbox"/> |
| Características del dolor (inicio de la cefalea, intensidad, localización, duración, calidad, ...)              | <input type="checkbox"/> | <input type="checkbox"/> | <input type="checkbox"/> |
| Síntomas asociados (náuseas, fotofobia, fonofobia, osmofobia,)                                                  | <input type="checkbox"/> | <input type="checkbox"/> | <input type="checkbox"/> |
| Factores predisponentes/desencadenantes                                                                         | <input type="checkbox"/> | <input type="checkbox"/> | <input type="checkbox"/> |
| Factores agravantes/aliviantes                                                                                  | <input type="checkbox"/> | <input type="checkbox"/> | <input type="checkbox"/> |
| Impacto de la migraña en su vida diaria (dolor que restringe la actividad)                                      | <input type="checkbox"/> | <input type="checkbox"/> | <input type="checkbox"/> |
| Fármacos tomados durante los ataques y su eficacia                                                              | <input type="checkbox"/> | <input type="checkbox"/> | <input type="checkbox"/> |
| El orden de los temas abordados durante la anamnesis debe definirse en una guía para la anamnesis de la migraña | <input type="checkbox"/> | <input type="checkbox"/> | <input type="checkbox"/> |
| Otros. Especifique                                                                                              | _____                    |                          |                          |

(\*sólo 1 respuesta por fila)

28. ¿Considera que la cumplimentación de un diario del paciente durante unas semanas durante el diagnóstico de la migraña discapacitante o crónica debería...?

- ☐ Obligatorio  
☐ Útil  
☐ No es necesario

(\* sólo es posible una respuesta)

(29. si P28: "obligatorio" o "útil")

29. En su opinión, ¿cuáles son los temas clave que deben registrarse en un diario de paciente?

|                                                   | Obligatorio              | Útil                     | No es necesario          |
|---------------------------------------------------|--------------------------|--------------------------|--------------------------|
| Días con dolor de cabeza                          | <input type="checkbox"/> | <input type="checkbox"/> | <input type="checkbox"/> |
| Cuánto duran los ataques de dolor de cabeza       | <input type="checkbox"/> | <input type="checkbox"/> | <input type="checkbox"/> |
| Características del dolor de cabeza               | <input type="checkbox"/> | <input type="checkbox"/> | <input type="checkbox"/> |
| Intensidad del dolor de cabeza                    | <input type="checkbox"/> | <input type="checkbox"/> | <input type="checkbox"/> |
| Medicación tomada                                 | <input type="checkbox"/> | <input type="checkbox"/> | <input type="checkbox"/> |
| Eficacia de la medicación                         | <input type="checkbox"/> | <input type="checkbox"/> | <input type="checkbox"/> |
| Impacto en la vida cotidiana                      | <input type="checkbox"/> | <input type="checkbox"/> | <input type="checkbox"/> |
| Impacto del ejercicio en la intensidad del ataque | <input type="checkbox"/> | <input type="checkbox"/> | <input type="checkbox"/> |
| Otros. Especifique                                | _____                    |                          |                          |

(\*sólo 1 respuesta por fila)



30. ¿Considera que incluir los siguientes temas en una guía para la anamnesis de la migraña para orientar durante la identificación de la migraña discapacitante o crónica sería....

|                                                                                    | Obligatorio              | Útil                     | No es necesario          |
|------------------------------------------------------------------------------------|--------------------------|--------------------------|--------------------------|
| Advertencias / "red flags"                                                         | <input type="checkbox"/> | <input type="checkbox"/> | <input type="checkbox"/> |
| Herramienta de diagnóstico validada                                                | <input type="checkbox"/> | <input type="checkbox"/> | <input type="checkbox"/> |
| Escala validada para medir el impacto de la migraña en la vida diaria del paciente | <input type="checkbox"/> | <input type="checkbox"/> | <input type="checkbox"/> |
| Recomendaciones para la derivación                                                 | <input type="checkbox"/> | <input type="checkbox"/> | <input type="checkbox"/> |
| Otros. Especifique                                                                 | _____                    |                          |                          |

(\* sólo 1 respuesta por fila)

31. Al considerar una guía para la anamnesis de la migraña para apoyarle en el diagnóstico de la migraña discapacitante o crónica. ¿Qué formato sería el más útil para su práctica diaria?

- ☐ Documento extenso y detallado, que incluya las preguntas a realizar, así como las herramientas que hay que utilizar, y las recomendaciones sobre cómo proceder
- ☐ Un breve documento descriptivo con recomendaciones sobre cómo proceder.
- ☐ Lista con los temas clave que deben abordarse durante la anamnesis.

(\* sólo es posible una respuesta)

32. Qué tipo de soporte sería más útil en su práctica diaria para que una guía para la anamnesis de la migraña le ayude en el diagnóstico de la migraña discapacitante o crónica.

- ☐ Documento impreso
- ☐ Documento descargable
- ☐ Documento en línea
- ☐ Aplicación para teléfonos móviles

(\* sólo es posible una respuesta)

Ha llegado al final del cuestionario. Muchas gracias por su valiosa colaboración.

*Equipo del proyecto My-LIFE Anamnesis Guide*
